# Supplementary material
Source: PubMed Central journal article supplement (PMC6419520)
Supplement: NIHMS1010050-supplement-Table_S4.pdf [file NIHMS1010050-supplement-Table_S4.pdf]

**Table S4. List of 1140 dsRNA amplicons screened in this study and their targeting genes**

| Amplicon             | Gene          |
|----------------------|---------------|
| DRSC08557            | CG2162        |
| DRSC11227            | Msr-110       |
| DRSC08556            | Sk2           |
| DRSC10484            | CG5146        |
| DRSC08290            | CG1271        |
| DRSC10486            | CG5150        |
| DRSC08489            | CG16753       |
| DRSC09748            | CG10591       |
| DRSC08413            | CG32486       |
| DRSC09746            | Sse           |
| DRSC08190            | CG11486       |
| DRSC11145            | DnaJ-1        |
| DRSC08538            | CG1869        |
| DRSC11313            | Ubp64E        |
| DRSC08733            | prominin-like |
| DRSC09745            | CG10576       |
| DRSC08200            | CG11537       |
| DRSC10509            | CG5505        |
| DRSC08298            | CG1291        |
| DRSC10512            | CG32912       |
| DRSC08415            | CG14956       |
| DRSC09742            | CG10542       |
| DRSC10949            | CG8006        |
| DRSC10683            | CG32053       |
| DRSC10952            | CG8023        |
| DRSC10681, DRSC34404 | CG6640        |
| DRSC09674            | CG7207        |
| DRSC10666            | CG32055       |
| DRSC10785            | CG7197        |
| DRSC10956            | CG32063       |
| DRSC10030            | CG13671       |
| DRSC11354            | hay           |
| DRSC10766            | CG7066        |
| DRSC11147            | E(z)          |
| DRSC10782            | CG7188        |
| DRSC10950            | CG8009        |
| DRSC10781            | CG7185        |
| DRSC10652            | CG32066       |
| DRSC10770            | CG7081        |
| DRSC10946            | CG8003        |
| DRSC10780            | CG7182        |
| DRSC10942            | simj          |
| DRSC10262            | CG17352       |
| DRSC10633            | CG6418        |
| DRSC08243            | CG12079       |
| DRSC10515            | CG5537        |
| DRSC08236            | CG32281       |
| DRSC10518            | CG5568        |
| DRSC08424            | CG14965       |
| DRSC09737            | Pole2         |
| DRSC08518            | gry           |

|                                 |                |
|---------------------------------|----------------|
| DRSC09736                       | CG32412        |
| DRSC08426                       | CG14967        |
| DRSC09734                       | CG10483        |
| DRSC08237                       | CG12034        |
| DRSC09684                       | Bj1            |
| DRSC08521                       | CG17746        |
| DRSC09733                       | CG10479        |
| DRSC08217                       | CG12009        |
| DRSC10649                       | Jon65Aiii      |
| DRSC08519                       | CG17723        |
| DRSC09730                       | CG10472        |
| DRSC08224                       | CG12016        |
| DRSC09791                       | loj            |
| DRSC08194                       | CG11526        |
| DRSC10738                       | Ets65A         |
| DRSC08221                       | PHGPx          |
| DRSC11164                       | Ets65A         |
| DRSC10779, DRSC34442, DRSC34441 | ldh            |
| DRSC10630                       | CG6409         |
| DRSC10777                       | CG33057, mkg-p |
| DRSC09672                       | CG6404         |
| DRSC10028                       | CG13667        |
| DRSC10625                       | CG6327         |
| DRSC10776                       | Oseg1          |
| DRSC10926                       | CG7888         |
| DRSC10322                       | mtrm           |
| DRSC10623                       | CG6321         |
| DRSC10763                       | CG32354        |
| DRSC10621                       | CG32069        |
| DRSC10761                       | CG7015         |
| DRSC10921                       | CG7839         |
| DRSC10757                       | CG6983         |
| DRSC11200                       | JIL-1          |
| DRSC10694                       | CG6683         |
| DRSC09859                       | Mnf            |
| DRSC10691                       | CG6673         |
| DRSC10607                       | Ufd1-like      |
| DRSC10292                       | CG32352        |
| DRSC10893                       | CG7628         |
| DRSC10608                       | CG32352        |
| DRSC10605                       | MRP            |
| DRSC08428                       | CG14969        |
| DRSC09717                       | CG10289        |
| DRSC08719                       | kst            |
| DRSC10829                       | CG7376         |
| DRSC08141                       | YT521-B        |
| DRSC09716                       | CG10274        |
| DRSC08653                       | Cycl           |
| DRSC11133                       | D19A           |
| DRSC08430                       | CG14971        |
| DRSC11309, DRSC32777            | Trn            |
| DRSC08665                       | ImpE2          |
| DRSC11207                       | LanA           |
| DRSC08658                       | Eip63E         |
| DRSC09715                       | CG10226        |

|                      |             |
|----------------------|-------------|
| DRSC08156            | CG10359     |
| DRSC11277            | SP1173      |
| DRSC08169            | CG32264     |
| DRSC09699            | CG32394     |
| DRSC08166            | CG10855     |
| DRSC09698            | CG10107     |
| DRSC08165            | CG32262     |
| DRSC10992            | CG8549      |
| DRSC08216            | CG12006     |
| DRSC09697            | CG10103     |
| DRSC10565            | CG5989      |
| DRSC10603            | GlcAT-P     |
| DRSC10616            | CG6282      |
| DRSC10601            | CG6199      |
| DRSC10627            | CG6372      |
| DRSC10600            | CG6190      |
| DRSC10564            | CG5978      |
| DRSC09681            | CG7600      |
| DRSC10631            | CG6416      |
| DRSC10878            | CG7557      |
| DRSC10563            | CG5971      |
| DRSC11335            | chrB        |
| DRSC11353            | h           |
| DRSC09857            | CG33047     |
| DRSC11255, DRSC26929 | Prm         |
| DRSC09856            | Mob1        |
| DRSC10546            | CG32030     |
| DRSC10587            | CG33490     |
| DRSC10545            | CG32030     |
| DRSC10582            | CG6091      |
| DRSC11338            | dally       |
| DRSC10581            | CG6084      |
| DRSC11219            | Mcm7        |
| DRSC10822            | CG7351      |
| DRSC08698            | Scsalpha    |
| DRSC09696            | CG32392     |
| DRSC08158            | CG1079      |
| DRSC09692            | Prat2       |
| DRSC08162            | Sc2         |
| DRSC09691            | CG10077     |
| DRSC08145            | CG10863     |
| DRSC11104            | CG9948      |
| DRSC08207            | CG11594     |
| DRSC11394            | Surf1       |
| DRSC08180            | CG1135      |
| DRSC11168            | G-ialpha65A |
| DRSC08184            | CG1136      |
| DRSC10193            | CG33171     |
| DRSC08711            | dib         |
| DRSC10194            | CG14823     |
| DRSC08741            | wit         |
| DRSC10297            | form3       |
| DRSC08451            | Faa         |
| DRSC11021            | corn        |
| DRSC08661            | Gad1        |

|                                 |               |
|---------------------------------|---------------|
| DRSC11017                       | CG8616        |
| DRSC08448                       | CG14989       |
| DRSC11235                       | Neos          |
| DRSC10542                       | CG5741        |
| DRSC09853                       | CG11660       |
| DRSC10540                       | CG5735        |
| DRSC11303                       | TfII $\alpha$ |
| DRSC10467                       | mRpL12        |
| DRSC10815                       | Sug           |
| DRSC10470                       | CG5026        |
| DRSC09851                       | CG11652       |
| DRSC10475                       | CG5064        |
| DRSC10809                       | CG7319        |
| DRSC10500                       | CG5288        |
| DRSC10573                       | CG6038        |
| DRSC10476                       | CG5068        |
| DRSC10808                       | Bmcp          |
| DRSC11397                       | smg           |
| DRSC10571                       |               |
| DRSC10492                       | CG5194        |
| DRSC10569                       | CG6004        |
| DRSC10460                       | Argk          |
| DRSC11253                       | Pi3K68D       |
| DRSC10456                       | CG4911        |
| DRSC11206                       | Klp68D        |
| DRSC10462                       | CG4942        |
| DRSC09847                       | CG11597       |
| DRSC08452                       | CG14995       |
| DRSC11015                       | mRpL50        |
| DRSC08450, DRSC34432, DRSC34433 | CG14991, Fit1 |
| DRSC11112                       | Cdc27         |
| DRSC08649                       | Chd64         |
| DRSC11014                       | Trap36        |
| DRSC08454                       | CG14998       |
| DRSC11011                       | RhoGEF4       |
| DRSC08691                       | RfC40         |
| DRSC11010                       | CG8605        |
| DRSC08693                       | Rop           |
| DRSC11009                       | CG8602        |
| DRSC08720                       | mas           |
| DRSC11007                       | CG8600        |
| DRSC08660                       | Ero1L         |
| DRSC11006                       | eco           |
| DRSC08204                       | VhaM9.7-1     |
| DRSC11362                       | lark          |
| DRSC08738                       | tipE          |
| DRSC11005                       | CG8596        |
| DRSC08666                       | ImpL2         |
| DRSC11004                       | CTCF          |
| DRSC08453                       | CG14997       |
| DRSC11003                       | pst           |
| DRSC10439                       | CG4641        |
| DRSC11123                       | CycA          |
| DRSC11264                       | Rdl           |
| DRSC10539                       | CG5718        |

|                                 |           |
|---------------------------------|-----------|
| DRSC10411                       | UGP       |
| DRSC10789                       | CG7252    |
| DRSC10421                       | CG4447    |
| DRSC10750                       | CG6931    |
| DRSC10422                       | CG4452    |
| DRSC10326                       | viaf      |
| DRSC11192                       | CG32041   |
| DRSC10537                       | CG5684    |
| DRSC11189                       | Hsp26     |
| DRSC10749                       | CG6928    |
| DRSC11188                       | Hsp23     |
| DRSC10715                       | I(3)J2D3  |
| DRSC11190                       | Hsp27     |
| DRSC10252                       | CG17153   |
| DRSC10398                       | CG4080    |
| DRSC09843                       | CG11560   |
| DRSC11342, DRSC32113, DRSC32114 | eIF-4E    |
| DRSC09840                       | CG11534   |
| DRSC10373                       | CG3672    |
| DRSC10532                       | CG5645    |
| DRSC08463                       | ago       |
| DRSC11001                       |           |
| DRSC08464                       | CG15011   |
| DRSC11000                       | CG8580    |
| DRSC08302                       | CG1309    |
| DRSC10998                       | SMSr      |
| DRSC08203                       | CG11586   |
| DRSC10997                       | CG8564    |
| DRSC08202                       | CG11583   |
| DRSC10994                       | CG8560    |
| DRSC08465                       | CG15012   |
| DRSC10335                       | CG33277   |
| DRSC08466                       | dyl       |
| DRSC11131                       | Cyp4d8    |
| DRSC08469                       | Cip4      |
| DRSC10988                       | CG8539    |
| DRSC08529                       | CG18314   |
| DRSC10871                       | CG7546    |
| DRSC08589                       | CG7447    |
| DRSC11363                       | lqf       |
| DRSC08591                       | Syx17     |
| DRSC10867                       | CG7526    |
| DRSC08178                       | CG11347   |
| DRSC10860                       | CG7506    |
| DRSC10374                       | CG3689    |
| DRSC10717                       | RhoGAP68F |
| DRSC10392                       | CG3967    |
| DRSC11238                       | Nrx       |
| DRSC11320                       | aay       |
| DRSC10529                       | Rh7       |
| DRSC10369                       | CG3529    |
| DRSC10528                       | thoc6     |
| DRSC10367                       | phol      |
| DRSC10412                       | CG4357    |
| DRSC10365                       | CG3434    |

|                      |              |
|----------------------|--------------|
| DRSC10293            | CG32103      |
| DRSC10371            | CG32043      |
| DRSC09750            | CG10616      |
| DRSC10330            | CG32043      |
| DRSC09768            | CG10657      |
| DRSC11314            | Uch-L3       |
| DRSC09777            | CG10681      |
| DRSC10372            | CG3654       |
| DRSC09779            | CG10686      |
| DRSC10364            | CG3428       |
| DRSC11248            | Pcaf         |
| DRSC10362            | CG32036      |
| DRSC09755            | CG10627      |
| DRSC08728            | nAcRbeta-64B |
| DRSC10855            | CG7492       |
| DRSC08182            | CG11353      |
| DRSC09871            | CG12262      |
| DRSC08327            | CG32245      |
| DRSC11184            | Hn           |
| DRSC08696            | Rpd3         |
| DRSC10834            | CG32369      |
| DRSC08708            |              |
| DRSC11381            | pbl          |
| DRSC08535            | CG18418      |
| DRSC10963            | syd          |
| DRSC08318            | Gef64C       |
| DRSC11259            | RNaseX25     |
| DRSC08596            | CG7509       |
| DRSC09676            | CG8042       |
| DRSC08656            | Dhc64C       |
| DRSC10958, DRSC34409 | CG8044       |
| DRSC08595            | Aats-leu     |
| DRSC11377            | nmo          |
| DRSC08692            | Rh50         |
| DRSC11327            | bip1         |
| DRSC08652            | Con          |
| DRSC10881            | CG7565       |
| DRSC11273, DRSC32598 | RpS9         |
| DRSC09751            | Tsf2         |
| DRSC10352            | CG3088       |
| DRSC10396            | CG4069       |
| DRSC10357            | CG3306       |
| DRSC09758            | CG10632      |
| DRSC11208            | LanB2        |
| DRSC11203            | Klc          |
| DRSC10980            | CG8336       |
| DRSC09817            | CG10984      |
| DRSC10712            | fry          |
| DRSC09813            | CG10973      |
| DRSC10978            | CG8329       |
| DRSC09812            | CG10971      |
| DRSC10304            | CG18180      |
| DRSC09809            | I(3)00305    |
| DRSC10222            | CG16719      |
| DRSC10277            | CG17667      |

|                      |            |
|----------------------|------------|
| DRSC11312            | UbcD4      |
| DRSC09801            | CG10754    |
| DRSC10705            | CG6761     |
| DRSC09807            | CG10960    |
| DRSC10302            | CG18178    |
| DRSC09821            | CG11009    |
| DRSC10433            | CG4603     |
| DRSC10929            | Ect4       |
| DRSC10436            | CG4618     |
| DRSC09677            | CG7927     |
| DRSC09773            | CG10672    |
| DRSC09669            | Arp66B     |
| DRSC09772            | CG10671    |
| DRSC11340            | msk        |
| DRSC09660            | Aats-ala-m |
| DRSC10933            | CG7942     |
| DRSC09679            | CG10670    |
| DRSC10938            | CdsA       |
| DRSC09771            | CG32423    |
| DRSC10858            | CG7498     |
| DRSC10440            | CG4669     |
| DRSC10941            | CG7979     |
| DRSC11361            | lama       |
| DRSC10840            | ERR        |
| DRSC10447            | CG4769     |
| DRSC10943            | CG7986     |
| DRSC09763            | Uev1A      |
| DRSC10833            | CG7387     |
| DRSC09753            | CG10625    |
| DRSC10828            | CG7375     |
| DRSC10300            | defl       |
| DRSC09822            | Ent3       |
| DRSC09659            | ATPsyn-b   |
| DRSC09799            | CG10752    |
| DRSC10170            |            |
| DRSC09830            | CG11261    |
| DRSC10969            | CG8177     |
| DRSC09829            | MICAL-like |
| DRSC10968            | Ilp2       |
| DRSC09827            | CG11255    |
| DRSC11113            | Cdk8       |
| DRSC11270, DRSC34294 | RpS12      |
| DRSC10699            | CG6718     |
| DRSC10278            | RpS12      |
| DRSC11298, DRSC33206 | Taf2       |
| DRSC11197            | ImpL1      |
| DRSC11109            | CalpB      |
| DRSC09711            | CG10171    |
| DRSC11231            | Nc         |
| DRSC09713            | CG10191    |
| DRSC10692            | CG6674     |
| DRSC09787            | CG10724    |
| DRSC09867            | Ard1       |
| DRSC09788            | CG10725    |
| DRSC09700            | CG10116    |

|                                 |          |
|---------------------------------|----------|
| DRSC10428                       | CG32158  |
| DRSC09796                       | CG32130  |
| DRSC11399                       | st       |
| DRSC09687                       | bru-3    |
| DRSC10407                       | CG4229   |
| DRSC11033                       | CG8745   |
| DRSC11223                       | Mipp1    |
| DRSC11050                       | CG8833   |
| DRSC11365                       | mbf1     |
| DRSC11175                       | Gl       |
| DRSC10403                       | nxf2     |
| DRSC11052                       | CG9028   |
| DRSC10223                       | Smn      |
| DRSC11044                       | CG8783   |
| DRSC09682                       | CG17286  |
| DRSC11051                       | CG9007   |
| DRSC11256, DRSC32168, DRSC32169 | Pros26   |
| DRSC10658                       | endos    |
| DRSC11224                       | Mo25     |
| DRSC10685                       | CG6650   |
| DRSC11142                       | Dbp73D   |
| DRSC11056                       | CG32210  |
| DRSC11781                       | CG5656   |
| DRSC11064                       | CG9300   |
| DRSC11763                       | Syx7     |
| DRSC11054                       | CG9231   |
| DRSC11866                       | Hr78     |
| DRSC11325                       | ash1     |
| DRSC11835                       | CG7529   |
| DRSC11299                       | Taf6     |
| DRSC11815                       | CG33214  |
| DRSC11067                       | CG9368   |
| DRSC11836                       | CG7597   |
| DRSC11049                       | CG8798   |
| DRSC11840                       | CG7611   |
| DRSC11047                       | CG8793   |
| DRSC11812                       | CG7173   |
| DRSC11324                       | asf1     |
| DRSC11849                       | Smc5     |
| DRSC11046, DRSC34110, DRSC34111 | CG8789   |
| DRSC11648                       | CG11307  |
| DRSC11043                       | Oat      |
| DRSC11647                       | CG11306  |
| DRSC10687                       | CG6661   |
| DRSC11093                       | CG9701   |
| DRSC11186                       | Hsc70Cb  |
| DRSC11237                       | Nrt      |
| DRSC10638                       | blue     |
| DRSC11094                       | CG9705   |
| DRSC10721                       | CG6833   |
| DRSC11095                       | CG9706   |
| DRSC11358                       | I(3)70Da |
| DRSC11088                       | CG9674   |
| DRSC10025                       | Sox21b   |
| DRSC11099                       | CG9715   |



|                                 |              |
|---------------------------------|--------------|
| DRSC10914                       | CG7768       |
| DRSC11396                       | Rh4, sina    |
| DRSC10931                       | CG7924       |
| DRSC11105                       | CG9951       |
| DRSC10928                       | CG7906       |
| DRSC09865                       | CG11915      |
| DRSC10024                       | CG13482      |
| DRSC09863                       | CG11905      |
| DRSC10380                       | CG3868       |
| DRSC11084                       | CG9665       |
| DRSC11400                       | stwl         |
| DRSC09854                       | Nc73EF       |
| DRSC11174                       | Gbeta76C     |
| DRSC11808                       | Trap220      |
| DRSC11038                       | CG8756       |
| DRSC11677                       | CG32444      |
| DRSC11032, DRSC31589            | CG8743       |
| DRSC11806                       | CG7158       |
| DRSC11180                       |              |
| DRSC11644                       | CG11248      |
| DRSC10987                       | CG8533       |
| DRSC11732                       | CG32447      |
| DRSC10104                       | CG14103      |
| DRSC11643                       | CG11247      |
| DRSC10218                       | CG15881      |
| DRSC11642                       | Rpb8         |
| DRSC11126                       | Cyp305a1     |
| DRSC11823                       |              |
| DRSC11031                       | Fibp         |
| DRSC11824                       | CG7407       |
| DRSC10983                       | kto          |
| DRSC11825                       | CG7414       |
| DRSC11246                       | Paps         |
| DRSC11802                       | CG7148       |
| DRSC11261                       | Rab8         |
| DRSC11801                       | CG7145       |
| DRSC10389                       | CG3919       |
| DRSC09673                       | CG3799       |
| DRSC11082                       | CG9628       |
| DRSC10375                       | CG3764       |
| DRSC11266                       | RecQ5        |
| DRSC10690                       | CG6664       |
| DRSC10281                       | dlp          |
| DRSC10907                       | CG7728       |
| DRSC10457                       |              |
| DRSC10686                       | CG6652       |
| DRSC10017                       | CG13473      |
| DRSC10908, DRSC32125, DRSC32126 | CG7729, Fit2 |
| DRSC11308                       | Trl          |
| DRSC10909                       | CG7730       |
| DRSC11065                       | CG9311       |
| DRSC10923                       | CG7842       |
| DRSC10502                       | CG5295       |
| DRSC10075                       | scaf6        |
| DRSC11072                       | CG9425       |

|                                 |            |
|---------------------------------|------------|
| DRSC10924                       | CG7853     |
| DRSC10497                       | gnu        |
| DRSC10906                       | rogdi      |
| DRSC11306                       | Tom        |
| DRSC10905                       | CG7724     |
| DRSC10954                       | Su(Tpl)    |
| DRSC11896                       | mub        |
| DRSC11274, DRSC32192            | Rpn1       |
| DRSC11800                       | DNApol-eta |
| DRSC10947                       | CG8004     |
| DRSC11828                       | CG7448     |
| DRSC10919                       | RhoGDI     |
| DRSC11831                       | CG7470     |
| DRSC09662, DRSC32652            | Ac76E      |
| DRSC11611                       | CG7139     |
| DRSC11346                       | fln        |
| DRSC11798                       | CG7133     |
| DRSC10899                       | Tom20      |
| DRSC11607                       | CG9063     |
| DRSC10901                       | CG7668     |
| DRSC11862                       | Ddx1       |
| DRSC10911                       | fat2       |
| DRSC11669                       | CG11523    |
| DRSC10182                       | CG14183    |
| DRSC11860                       | Csp        |
| DRSC10185                       | CG14186    |
| DRSC11668                       | CG11489    |
| DRSC10824                       | CG7365     |
| DRSC11865                       | Hem        |
| DRSC10482                       | CG5114     |
| DRSC10657                       | CG6512     |
| DRSC11257, DRSC32178, DRSC32179 | Prosbeta2  |
| DRSC10647                       | CG6479     |
| DRSC10504                       | CG5392     |
| DRSC10639                       | Mip        |
| DRSC10700                       | cp309      |
| DRSC11328                       | blot       |
| DRSC10711                       | Aats-gly   |
| DRSC10384                       | CG3885     |
| DRSC10728                       | CG6854     |
| DRSC10883                       | Oatp74D    |
| DRSC10005                       | CG13458    |
| DRSC10624                       | CG6322     |
| DRSC10244                       | CG17081    |
| DRSC10620                       | CG6311     |
| DRSC10230                       | CG16959    |
| DRSC11124                       | CycT       |
| DRSC09879                       | CG12316    |
| DRSC10613                       | Eip74EF    |
| DRSC10731                       | CG6859     |
| DRSC10861                       | CG7510     |
| DRSC10735                       | CG6876     |
| DRSC10857                       | CG7497     |
| DRSC11351                       | gig        |
| DRSC11667                       | Aats-ile   |

|                      |                |
|----------------------|----------------|
| DRSC10756            | CG6981         |
| DRSC11661            | CG11440        |
| DRSC10802            | CG7298         |
| DRSC11794            | CG6838         |
| DRSC10751            | CG6933         |
| DRSC11894            | mael           |
| DRSC10250            | CG17149        |
| DRSC11652            | CG32454        |
| DRSC10259            | CG17233        |
| DRSC11641            | CG11241        |
| DRSC11116            | Clc            |
| DRSC11640            | I(3)04053      |
| DRSC10323            | CG32226        |
| DRSC11822            | CG7369         |
| DRSC11384, DRSC34463 | polo           |
| DRSC11889            | jim            |
| DRSC11285            | Snap           |
| DRSC11851            | CG32462        |
| DRSC10693            | CG6680         |
| DRSC11606            | Arf79F         |
| DRSC11779            | eRF1           |
| DRSC11633            | CG11109        |
| DRSC10760            | CG7011, CG6876 |
| DRSC11252            | Pep            |
| DRSC10790            | CG7255         |
| DRSC11201            | CG32177        |
| DRSC10918            | ran-like       |
| DRSC10062            | Ccn            |
| DRSC10796            | CG7275         |
| DRSC10566            | Adgf-A         |
| DRSC10934            | CG7945         |
| DRSC10523            | CG5589         |
| DRSC11122            | CrebA          |
| DRSC10519            | CG5577         |
| DRSC10847            | AGO2           |
| DRSC10517            | CG5567         |
| DRSC10655            | CG6498         |
| DRSC10516            | CG5546         |
| DRSC10231            | CG16979        |
| DRSC10845            | CG7430         |
| DRSC10913            | Tfb2           |
| DRSC10848            | CG7441         |
| DRSC09875            | CG12301        |
| DRSC10514            | CG5535         |
| DRSC09877            | CG12304        |
| DRSC10501            | CG5290         |
| DRSC11780            | CG5618         |
| DRSC11630            | Chro           |
| DRSC11610            | DNAprim        |
| DRSC11634            | Ssl1           |
| DRSC11867            | Ide            |
| DRSC11635            | slif           |
| DRSC11877            | RhoBTB         |
| DRSC11637            | CG11133        |
| DRSC11608            | CG5498         |

|                      |           |
|----------------------|-----------|
| DRSC11632            | Mes2      |
| DRSC11775            | CG5282    |
| DRSC11917            | alpha-Cat |
| DRSC11774            | CG5274    |
| DRSC11933            |           |
| DRSC11773            | CG5262    |
| DRSC12206            | CG12581   |
| DRSC11772            | Las       |
| DRSC12208            | CG12582   |
| DRSC11771            | mRpL15    |
| DRSC12161            | auxillin  |
| DRSC11670            | CG11796   |
| DRSC12288            | CG18143   |
| DRSC11787            | CG5932    |
| DRSC12227            | CG14641   |
| DRSC10900            | CG7656    |
| DRSC11161            | Eip75B    |
| DRSC10232            | RhoGAP71E |
| DRSC10047            | CG13698   |
| DRSC10827            | CG7372    |
| DRSC10485            | CG5147    |
| DRSC10594            | CG6151    |
| DRSC10818            | CG7341    |
| DRSC10597            | CG6169    |
| DRSC10807            | CheA75a   |
| DRSC09900            | CG12713   |
| DRSC09988            | CG13380   |
| DRSC10590            | CG6114    |
| DRSC11378            | not       |
| DRSC10243            | GXIVsPLA2 |
| DRSC10744            | CG6897    |
| DRSC10242            | CG17033   |
| DRSC10743            | CG6896    |
| DRSC10559, DRSC32419 | CG5931    |
| DRSC10404            | GGBP2     |
| DRSC10238            | CG17027   |
| DRSC10401            | Chmp1     |
| DRSC10570            | CG6017    |
| DRSC11125            | Cyp12c1   |
| DRSC11788            | CG5955    |
| DRSC12372, DRSC31883 | abs       |
| DRSC11697            | CG32428   |
| DRSC12350            | Gel       |
| DRSC11789            | CG5969    |
| DRSC12228            | CG14642   |
| DRSC11791, DRSC34398 | CG6020    |
| DRSC12225            | CG14639   |
| DRSC11742            | CG18281   |
| DRSC12151            | CG1092    |
| DRSC11764            | CG32425   |
| DRSC12333            | CG9780    |
| DRSC11759            | CG5047    |
| DRSC12124            | CG1102    |
| DRSC11892            | knrl      |
| DRSC12332, DRSC34417 | CG9779    |

|                      |                |
|----------------------|----------------|
| DRSC11874            | Pitslre        |
| DRSC12335            | CG9791         |
| DRSC11750            | CG3947         |
| DRSC12336            | CG9795         |
| DRSC11655            | CG11399        |
| DRSC12127, DRSC34416 | CG9776         |
| DRSC11749            | CG3698         |
| DRSC12329            | CG9772         |
| DRSC10556            | mRpS31         |
| DRSC10397            | Nufip          |
| DRSC11404            | th             |
| DRSC10736            | Aut1           |
| DRSC10525            | Mbs            |
| DRSC10734            | l(3)neo26      |
| DRSC10495            | CG5241         |
| DRSC10393            | Indy           |
| DRSC10499            | CG5284         |
| DRSC11263            | Rad9           |
| DRSC10493            | CG5222         |
| DRSC11315            | Ugt            |
| DRSC11318            | Zn72D          |
| DRSC10390            | CG3961         |
| DRSC11297, DRSC31762 | Taf4           |
| DRSC10386            | CG3893         |
| DRSC10490            | Pgm            |
| DRSC11108            | CSN1b          |
| DRSC11290            | SsRbeta        |
| DRSC10724            | CG6841         |
| DRSC10229            | CG16838        |
| DRSC10723            | CG6839         |
| DRSC10468            | CG5018         |
| DRSC10722            | CG6836         |
| DRSC11755            | CG4365         |
| DRSC12160            | CG1103, CG9772 |
| DRSC11748            | CG3680         |
| DRSC12150            | CG1090         |
| DRSC11746            | CG3618         |
| DRSC12149            | Cont           |
| DRSC11875            | Pka-R1         |
| DRSC12389            | tub            |
| DRSC11674            | CG12452        |
| DRSC12232            | CG14646        |
| DRSC11665            | CG11456        |
| DRSC12344            | CG9855         |
| DRSC11887            | fng            |
| DRSC12343            | CG9853         |
| DRSC11625            | CG10585        |
| DRSC12233            | CG14647        |
| DRSC11621            | CG10566        |
| DRSC12234, DRSC34034 | CG14648        |
| DRSC11620            | CG10565        |
| DRSC12143            | CG1074         |
| DRSC11618            | park           |
| DRSC12338            | CG9804         |
| DRSC11617            | park           |

|                      |           |
|----------------------|-----------|
| DRSC12236            | CG14650   |
| DRSC10471, DRSC34390 | CG5027    |
| DRSC10295            | CG18135   |
| DRSC10459            | CG4925    |
| DRSC10084            | Mkp3      |
| DRSC11249            | Pdh       |
| DRSC10720            | MESR6     |
| DRSC10451            | CG4818    |
| DRSC09845            | CG11577   |
| DRSC10449            | CG4784    |
| DRSC09722            | CG10424   |
| DRSC10227            | CG16807   |
| DRSC09721            | CG10419   |
| DRSC10445            | CG4729    |
| DRSC10087            | fz2       |
| DRSC10443            | CG4877    |
| DRSC11218            | Max       |
| DRSC10441            | CG4680    |
| DRSC11085            | CG9666    |
| DRSC11345            | fax       |
| DRSC11083            | CG9629    |
| DRSC11296            | TMS1      |
| DRSC11081            | CG9619    |
| DRSC10430            | Aats-tyr  |
| DRSC11087            | fal       |
| DRSC11614            | CG10510   |
| DRSC12337, DRSC34377 | CG31523   |
| DRSC11612            | CG10508   |
| DRSC12147            | CG1078    |
| DRSC11857            | CG9389    |
| DRSC11990            | 5-HT2     |
| DRSC11603            | AcCoAS    |
| DRSC12330            | CG9775    |
| DRSC11899            | ppl       |
| DRSC12142            | Trap18    |
| DRSC11848            | Z4        |
| DRSC12386            | rpk       |
| DRSC11650            | CG11309   |
| DRSC12355            | Karybeta3 |
| DRSC11837            | Rab26     |
| DRSC12139            | CG31531   |
| DRSC11821            | CG7338    |
| DRSC12141            | CG31534   |
| DRSC11820            | CG7324    |
| DRSC12126            | Nep2      |
| DRSC11609, DRSC34396 | CG6014    |
| DRSC12388            | tacc      |
| DRSC11792            | CG6049    |
| DRSC12310, DRSC34353 | atms      |
| DRSC14140            | Aats-gln  |
| DRSC14133            | CG14526   |
| DRSC14248            | CG10513   |
| DRSC16650            | Doa       |
| DRSC14428            | CG11892   |
| DRSC14873            | CG14521   |

|                      |           |
|----------------------|-----------|
| DRSC14251            | CG10550   |
| DRSC15403            | CG1951    |
| DRSC14257            | CG10562   |
| DRSC14146            | CG1957    |
| DRSC14262            | CG10675   |
| DRSC16791            | Pkc98E    |
| DRSC17044            | rha       |
| DRSC14397            | CG11837   |
| DRSC16676            | Fur1      |
| DRSC14399            | CG11841   |
| DRSC14438            |           |
| DRSC14400            | CG11842   |
| DRSC15722            | CG5127    |
| DRSC14294            | Sirt7     |
| DRSC15594            | XNP       |
| DRSC14418            | CG11874   |
| DRSC15036, DRSC34369 | CG1544    |
| DRSC18494            | CG11448   |
| DRSC16925            | chp       |
| DRSC17952            |           |
| DRSC15035            | CG1542    |
| DRSC18604            | CG14785   |
| DRSC15236            | CG1746    |
| DRSC18605            | CG14786   |
| DRSC14467            | CG12054   |
| DRSC18607            | I(1)G0431 |
| DRSC15240            | CG1750    |
| DRSC18608            | O-fut2    |
| DRSC14475            | CG12114   |
| DRSC18565            | pck       |
| DRSC15130            | CG1607    |
| DRSC18567            | Rab27     |
| DRSC16678            | Gcn2      |
| DRSC18568            | CG14782   |
| DRSC14304            | CG11337   |
| DRSC18512            | CG32810   |
| DRSC16682            | Gprk2     |
| DRSC17788            | CG11509   |
| DRSC15718            | CG5112    |
| DRSC14420            | CG11876   |
| DRSC15716            | CG5107    |
| DRSC14421            | CG11877   |
| DRSC15615            | CG4673    |
| DRSC14423            | CG11880   |
| DRSC15621            | CG4685    |
| DRSC14424            | CG11881   |
| DRSC15707            | CG5053    |
| DRSC14148            | Vha100-1  |
| DRSC15655            | LpR2      |
| DRSC16787            | Pglym78   |
| DRSC15665            | LpR1      |
| DRSC16839, DRSC32198 | Rpn2      |
| DRSC15908            | CG5886    |
| DRSC14431            | CG11897   |
| DRSC14147            | Tsp96F    |

|                      |                  |
|----------------------|------------------|
| DRSC14866            | CG14507, CG14514 |
| DRSC16729            | Lnk              |
| DRSC14155            | CG15817          |
| DRSC16758, DRSC34356 | Nf1              |
| DRSC14443            | CG31445          |
| DRSC16697            | HLHmbeta         |
| DRSC17071            | stg              |
| DRSC14468            | CG12063          |
| DRSC18765            | dor              |
| DRSC14322, DRSC33088 | pygo             |
| DRSC18507            | CG32809          |
| DRSC15131            | CG1635           |
| DRSC18592            | CG32809          |
| DRSC15258            | CG1774           |
| DRSC18733            | a6               |
| DRSC14324            | CycG             |
| DRSC18593            | CG3795           |
| DRSC15295            | CG1800           |
| DRSC17958            | CG14801          |
| DRSC15310            | CG1815           |
| DRSC18760, DRSC31062 | deltaCOP         |
| DRSC15434            | CstF-50          |
| DRSC18553            | CG14814          |
| DRSC15395, DRSC29064 | CG1890           |
| DRSC18551            | CG14816          |
| DRSC15397            | CG1896           |
| DRSC18555            | CG14804          |
| DRSC15432            | I(3)s1921        |
| DRSC18845            | trr              |
| DRSC15400            | CG1910           |
| DRSC18550            | mRpL16           |
| DRSC16962            | gro              |
| DRSC15439            | CG2321           |
| DRSC14886            | CG14542          |
| DRSC15412            | CG2006           |
| DRSC16643            | Dak1             |
| DRSC15413            | CG2010           |
| DRSC14898            | CG31324          |
| DRSC15437            | Trc8             |
| DRSC15962            | CG6073           |
| DRSC17002            | Dr               |
| DRSC14497            | CG12290          |
| DRSC15398            | CG1906           |
| DRSC14109            | Ald              |
| DRSC15399            | CG1907           |
| DRSC15981            | CG31085          |
| DRSC14168            | Bub3             |
| DRSC16931            | dei              |
| DRSC15401            | CAP-D2           |
| DRSC15805            | CG5455           |
| DRSC16690            | Gycalpha99B      |
| DRSC16054            | CG6490           |
| DRSC14131            | CG7601           |
| DRSC15809            | CG5467           |
| DRSC16266            | CG7598           |



|                      |                |
|----------------------|----------------|
| DRSC15427            | CG2196         |
| DRSC18738            | arm            |
| DRSC15419            | CG2135         |
| DRSC17963            | CG32803        |
| DRSC15402            | sip3           |
| DRSC18573            | CG3810         |
| DRSC15417            | CG2118         |
| DRSC18769            | eIF2B-epsilon  |
| DRSC14101            | Acf1           |
| DRSC18576            | CG3573         |
| DRSC15406            | CG1971         |
| DRSC18540            | CG11596        |
| DRSC16948            | ferrochelatase |
| DRSC18542            | CG3857         |
| DRSC15409, DRSC34466 | RhoGAP100F     |
| DRSC18541            | CG3587         |
| DRSC16999            | mod            |
| DRSC17724, DRSC34351 | Actn           |
| DRSC16732            | Map205         |
| DRSC18514            | CG4313         |
| DRSC17176            | pan            |
| DRSC18521            | CG4281         |
| DRSC17127            | Ank            |
| DRSC18519            | CG4199         |
| DRSC16042            | CG6447         |
| DRSC15405            | CG1969         |
| DRSC16038            | CG6425         |
| DRSC14151            | CG7609         |
| DRSC16885            | TI             |
| DRSC15407            | CG1972         |
| DRSC16702            | His2Av         |
| DRSC16977            | kay            |
| DRSC14136            | sda            |
| DRSC16325            | CG7837         |
| DRSC16022            | CG6330         |
| DRSC16715            | Ice            |
| DRSC16019            | Tsp97E         |
| DRSC16324            | CG7834         |
| DRSC16013            | CG6296         |
| DRSC16312            | CG7789         |
| DRSC16006            | CG6271         |
| DRSC17012            | ncd            |
| DRSC16757            | NepYr          |
| DRSC15305            | CG31037        |
| DRSC16004            | Nep5           |
| DRSC16316            | CG7802         |
| DRSC17065            | spz            |
| DRSC15052            | CG31033        |
| DRSC17157            | CG2316         |
| DRSC18520            | CG4194         |
| DRSC17137            | CG31998        |
| DRSC18517            | CG4061         |
| DRSC17163            | Crk            |
| DRSC18518            | CG4045         |
| DRSC17167            | Rad23          |

|                                 |             |
|---------------------------------|-------------|
| DRSC18577                       | CG3835      |
| DRSC17154, DRSC34373, DRSC34374 | Ac76E       |
| DRSC18697                       | Pgd         |
| DRSC17143                       | Hcf         |
| DRSC18851                       | wapl        |
| DRSC17128                       | CG2052      |
| DRSC18499                       | CG3630      |
| DRSC17152                       | lgs         |
| DRSC18458                       | Cyp4d2      |
| DRSC17162                       | CaMKI       |
| DRSC18455                       | Cyp4ae1     |
| DRSC17170                       | bip2        |
| DRSC18822                       | pn          |
| DRSC17178                       | zfh2        |
| DRSC18687                       | Nmd3        |
| DRSC17166                       | Pur-alpha   |
| DRSC18509, DSC34386             | CG3457      |
| DRSC15961                       | CG6070      |
| DRSC16317                       | Cad99C      |
| DRSC15906                       | CG5880      |
| DRSC15301                       | CG18041     |
| DRSC15958                       | CG6059      |
| DRSC15053                       | CG15514     |
| DRSC15956                       | CG6051      |
| DRSC16320                       | CG7816      |
| DRSC15939                       | CG31063     |
| DRSC16319                       | CG7814      |
| DRSC15936                       | CG18766     |
| DRSC15051                       | CG31038     |
| DRSC17026                       | pII         |
| DRSC15058                       | capa        |
| DRSC16882                       | TfIIA-L     |
| DRSC16329                       | CG7866      |
| DRSC15928                       | woc         |
| DRSC16332                       | eIF2B-alpha |
| DRSC16983                       | I(3)mbt     |
| DRSC16335                       | CG7896      |
| DRSC15923                       | CG5938      |
| DRSC14318                       | CG11504     |
| DRSC15485                       | CG3368      |
| DRSC16340                       | Tace        |
| DRSC17150                       | CG1909      |
| DRSC18728, DRSC32186            | Vinc        |
| DRSC17135                       | CG31992     |
| DRSC18816                       | pcx         |
| DRSC17146                       | Slip1       |
| DRSC18775                       | fs(1)K10    |
| DRSC17174                       | myoglianin  |
| DRSC18755, DRSC31852            | crn         |
| DRSC17129, DRSC34355, DRSC34356 | bt          |
| DRSC18530                       | CG3191      |
| DRSC17171                       | bt          |
| DRSC18531                       | CG3078      |
| DRSC17148                       | Arc70       |

|                      |                          |
|----------------------|--------------------------|
| DRSC18271            | I(1)G0144                |
| DRSC17205            | CG11155                  |
| DRSC18526            | CG3071                   |
| DRSC17196            | cals                     |
| DRSC18525            | CG2924                   |
| DRSC17216            | RfaBp                    |
| DRSC18524            | CG2918                   |
| DRSC17214            | CaMKII                   |
| DRSC18527            | CG2865                   |
| DRSC17220            | plexA                    |
| DRSC18855            | z                        |
| DRSC15481            | bigmax                   |
| DRSC16759            | Nlp                      |
| DRSC15477            | CG3330                   |
| DRSC16346            | CG7920                   |
| DRSC15853            | CG5646                   |
| DRSC16347, DRSC34446 | Mgat2                    |
| DRSC15850            | dsd                      |
| DRSC14120            | Axn                      |
| DRSC14161            | Rp510a                   |
| DRSC16349            | CG7928                   |
| DRSC15839            | CG5590                   |
| DRSC16868            | Sry-beta                 |
| DRSC16825            | Sce                      |
| DRSC16869            | Sry-delta                |
| DRSC14568            | CG12880                  |
| DRSC16351            | CG7943                   |
| DRSC14564            | CG12876                  |
| DRSC16352            | CG7946                   |
| DRSC14566            | btz                      |
| DRSC16353            | CG7950                   |
| DRSC14518            | CG12428                  |
| DRSC15421            | CG31025                  |
| DRSC15694            | CG5003                   |
| DRSC16888            | Tpi                      |
| DRSC17222            | toy                      |
| DRSC18676            | Klp3A                    |
| DRSC17201            | CG32016                  |
| DRSC18793            | mit(1)15                 |
| DRSC17218            | eIF-4G                   |
| DRSC18427, DRSC32087 | CG8636                   |
| DRSC17223            | unc-13                   |
| DRSC18501            | CG2652                   |
| DRSC17202            | CG11148                  |
| DRSC18464            | CG2681                   |
| DRSC17204            | Sox102F                  |
| DRSC18470            | CG2694                   |
| DRSC18752            | cin                      |
| DRSC18590            | CG2701                   |
| DRSC18459            | Cyp4g1                   |
| DRSC18776            | fs(1)Ya                  |
| DRSC18787            | Exp6                     |
| DRSC18766            | dwg                      |
| DRSC18288            | CG18166, CG3176, CG32817 |
| DRSC18587            | CG2713                   |

|                                 |                 |
|---------------------------------|-----------------|
| DRSC18505                       | CG18273         |
| DRSC18589                       | CG2712          |
| DRSC18503                       | CG3156          |
| DRSC18754                       | crm             |
| DRSC14488                       | mRpS22          |
| DRSC16741, DRSC32500, DRSC32501 | Mlc2            |
| DRSC14487                       | CG33213         |
| DRSC16554                       | CG9747          |
| DRSC15693                       | CG4980          |
| DRSC16536                       | CG9682          |
| DRSC16833, DRSC32560            | RpL4            |
| DRSC16671                       | Fer1HCH         |
| DRSC14132                       | CG5508          |
| DRSC14141                       | CG2217          |
| DRSC15824                       | CG5514          |
| DRSC15428                       | CG2218          |
| DRSC15827                       | Gp93            |
| DRSC16901                       | aralar1         |
| DRSC15682                       | CG4951          |
| DRSC14932                       | CDase           |
| DRSC14925                       | CG31374         |
| DRSC14473                       | PH4alphaEFB     |
| DRSC16749                       | Mst98Ca         |
| DRSC16546, DRSC34461            | PH4alphaNE1     |
| DRSC14598                       | Gfat2           |
| DRSC16975                       | jdp             |
| DRSC15364                       | Moca-cyp        |
| DRSC17062, DRSC34480, DRSC34481 | spdo            |
| DRSC18502                       | CG17896         |
| DRSC17764                       | CG10804         |
| DRSC18737                       | arg             |
| DRSC17762                       | CG10802         |
| DRSC18772                       | elav            |
| DRSC17763                       | CG10803         |
| DRSC18557                       | CG4293          |
| DRSC18231                       | CG2875          |
| DRSC17728                       | Appl            |
| DRSC18696                       | Parg            |
| DRSC18487                       | CG13366         |
| DRSC17894                       | Mnt             |
| DRSC18788                       | I(1)1Bi         |
| DRSC18245                       | CG32789, CG2947 |
| DRSC18461                       | Dredd           |
| DRSC18854                       | yin             |
| DRSC18482                       | Suv4-20         |
| DRSC17730                       | CG2930          |
| DRSC18833                       | skpA            |
| DRSC18242                       | VhaAC39         |
| DRSC18831                       | sdk             |
| DRSC18243                       | CG2938          |
| DRSC18537                       | Pomt2           |
| DRSC18384                       | Vap-33-1        |
| DRSC15034                       | CG31051         |
| DRSC15433                       | CG2246          |
| DRSC16761                       | Noa36           |

|                     |                  |
|---------------------|------------------|
| DRSC16541           | PH4alphaNE3      |
| DRSC16709           | Hrb98DE          |
| DRSC14596           | CG1342           |
| DRSC16586           | CG9986           |
| DRSC14582           | CG1340           |
| DRSC14174           | CG10011          |
| DRSC17098           | zfh1             |
| DRSC16589           | CG9990           |
| DRSC14126           | CG31012          |
| DRSC14528           | CG12558          |
| DRSC16849           | Sap-r            |
| DRSC17095           | wdn              |
| DRSC16631           | Cyp4c3           |
| DRSC15133           | CG1646           |
| DRSC12635           | 5-HT7            |
| DRSC15033           | CG1523           |
| DRSC16929           | dco              |
| DRSC15134           | CG1647           |
| DRSC14299           | CG11317          |
| DRSC14857           | inx3             |
| DRSC16691           | Gycbeta100B      |
| DRSC18536           | CG13360          |
| DRSC18403, DSC31278 | lva              |
| DRSC18704           | Rbf              |
| DRSC18746           | brn              |
| DRSC18538           | CG7359           |
| DRSC18662           | CG6133           |
| DRSC17747           | CDC45L           |
| DRSC18661           | CG6121           |
| DRSC18840           | su(w<uP>a</uP>)  |
| DRSC18664           | Fas2             |
| DRSC18532           | CG11403          |
| DRSC18252           | CG2982           |
| DRSC18579           | CG11409          |
| DRSC18806           | norpA            |
| DRSC18583           | CG11412          |
| DRSC18309           | CG3556           |
| DRSC18580           | CG12773          |
| DRSC18310           | CG3564           |
| DRSC18581           | CG11417          |
| DRSC17783           | CG11436          |
| DRSC18492           | CG3056           |
| DRSC17784           | CG11444          |
| DRSC18714           | SNF1A            |
| DRSC18559           | CG12179, CG12184 |

---

Additional information on the specific genes can be obtained at <http://flyrnai.org/>.
